# Supplementary material for: A first-draft human protein-interaction map
Source: PubMed Central journal article supplement (PMC522870; doi:10.1186/gb-2004-5-9-r63), 2004-08-13
Supplement: gb-2004-5-9-r63-s3.pdf [file gb-2004-5-9-r63-s3.pdf]

## Lehner & Fraser Supplementary figure 1 (page 1 of 3 pages)

**The accuracy and coverage of GO term prediction are similar for GO terms at different depths in the GO hierarchy.** To predict the GO terms of a protein, we identified all of the GO terms associated with  $x$  or more of its interaction partners in the core interaction network (where  $x$  varied from 1 to 6). This was done for GO terms found at maximum depths of 3 to 8 or  $>8$  in the GO hierarchy. To validate the accuracy and coverage of this approach we predicted GO terms for every gene that already has at least one associated GO term. **(A)** Accuracy of GO term predictions for GO terms at different levels in the GO hierarchy. The proportion of correctly predicted GO terms are shown for GO terms shared by 1 to 6 of a protein's interaction partners. Accuracy was calculated as the total number of correct GO term predictions divided by the total number of GO term predictions. **(B)** The coverage of GO term predictions is calculated as the total number of correct GO term predictions divided by the total number of known GO terms for the same GO predictions as in (A). **(C)** The total number of GO terms at each depth in the GO hierarchy for every protein in the core interaction network with at least one associated GO term. **(D)** The total number of GO terms predicted by  $x$  or more core interaction partners at each depth in the GO hierarchy for every protein in the core interaction network with at least one associated GO term. **(E)** The number of correctly predicted GO terms predicted by  $x$  or more core interaction partners at each depth in the GO hierarchy for every protein in the core interaction network with at least one associated GO term. To avoid biasing the results we ignored self-interactions, as these will always share GO terms. For the same reason, we also only counted once GO terms associated with more than one interaction partner predicted by the same source interaction from a model organism.

Lehner & Fraser Supplementary figure 1 (page 2 of 3 pages)

**A**

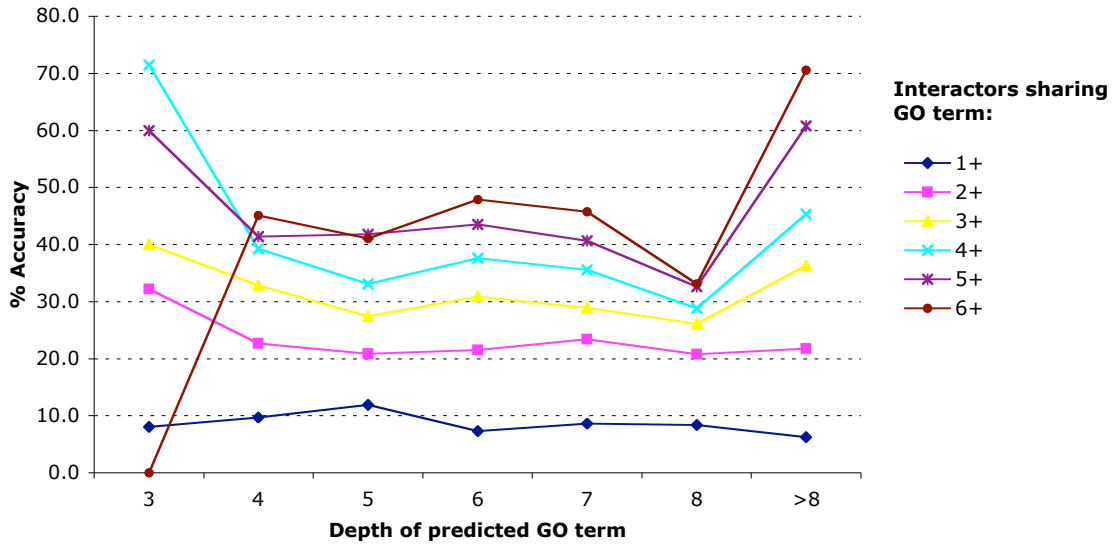

**B**

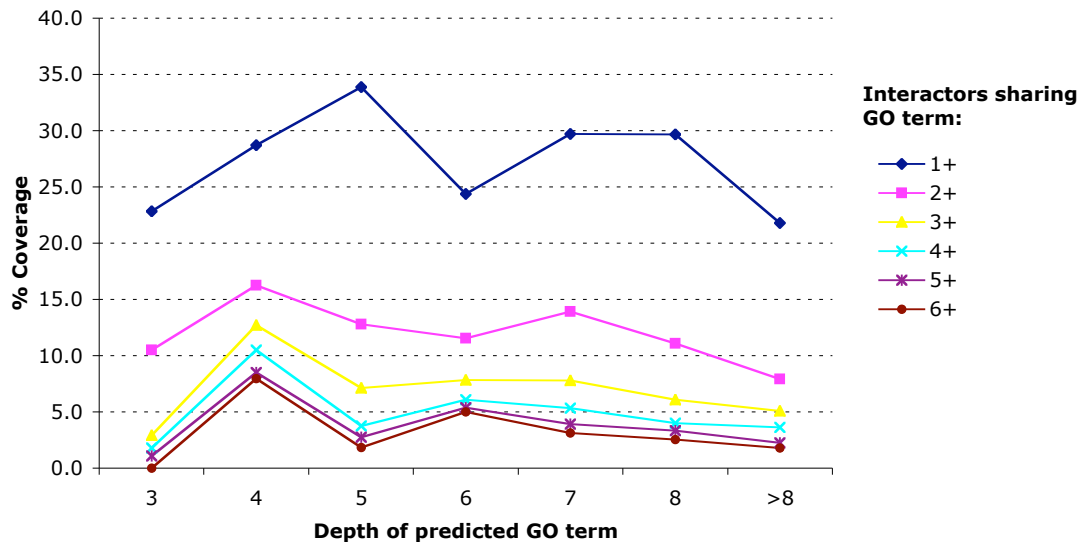

## Lehner & Fraser Supplementary figure 1 (page 3 of 3 pages)

### C

Total number of annotated GO terms.

| GO depth |      |      |      |      |      |      |       |
|----------|------|------|------|------|------|------|-------|
| 3        | 4    | 5    | 6    | 7    | 8    | >8   | All   |
| 779      | 6660 | 7119 | 6071 | 6523 | 6641 | 7051 | 40844 |

### D

Total number of GO terms predicted by x or more core interaction partners.

| GO depth |     |      |      |      |      |      |      |       |
|----------|-----|------|------|------|------|------|------|-------|
|          | 3   | 4    | 5    | 6    | 7    | 8    | >8   | All   |
| X=1      | 779 | 6660 | 7119 | 6071 | 6523 | 6641 | 7051 | 40844 |
| X=2      | 90  | 1614 | 1536 | 982  | 1125 | 999  | 736  | 7082  |
| X=3      | 20  | 871  | 652  | 463  | 508  | 437  | 284  | 3235  |
| X=4      | 7   | 601  | 284  | 295  | 284  | 260  | 161  | 1892  |
| X=5      | 5   | 461  | 165  | 225  | 182  | 193  | 74   | 1305  |
| X=6      | 1   | 397  | 112  | 190  | 129  | 145  | 51   | 1025  |

### E

Number of correctly predicted GO terms predicted by x or more core interaction partners.

| GO depth |    |     |     |     |     |     |     |      |
|----------|----|-----|-----|-----|-----|-----|-----|------|
|          | 3  | 4   | 5   | 6   | 7   | 8   | >8  | All  |
| X=1      | 63 | 646 | 849 | 445 | 562 | 558 | 440 | 3563 |
| X=2      | 29 | 366 | 321 | 211 | 263 | 208 | 160 | 1558 |
| X=3      | 8  | 286 | 179 | 143 | 147 | 114 | 103 | 980  |
| x=4      | 5  | 236 | 94  | 111 | 101 | 75  | 73  | 695  |
| x=5      | 3  | 191 | 69  | 98  | 74  | 63  | 45  | 543  |
| x=6      | 0  | 179 | 46  | 91  | 59  | 48  | 36  | 459  |
